# Supplementary material for: “Y”-shaped BP/PbS/PbSe nano-devices based on silicon carbide nanoribbons
Source: Royal Society of Chemistry journal article supplement (doi:10.1039/c8ra07372d), 2018-01-01
Supplement: c8ra07372d1.pdf [file c8ra07372d1.pdf]

## Supporting Information

### **“Y”-shaped BP/PbS/PbSe nano-devices based on silicon carbide nanoribbons**

*Lishu Zhang,<sup>a</sup> Tao Li,<sup>a</sup> Yanyan Jiang,<sup>\*a</sup> Hamidreza Arandiyan,<sup>\*b</sup> Hui Li<sup>\*a</sup>*

*<sup>a</sup>Key Laboratory for Liquid-Solid Structural Evolution and Processing of Materials,  
Ministry of Education, Shandong University, Jinan 250061, People's Republic of China*

*<sup>b</sup>Laboratory of Advanced Catalysis for Sustainability, School of Chemistry, The  
University of Sydney, Sydney 2006, Australia*

\* Correspondence: [yanyan.jiang@sdu.edu.cn](mailto:yanyan.jiang@sdu.edu.cn) (Y. J.), [hamid.arandiyan@sydney.edu.edu.au](mailto:hamid.arandiyan@sydney.edu.edu.au)  
(H. A.) [lihuilmy@hotmail.com](mailto:lihuilmy@hotmail.com) (H. L.) Tel.: +86-531-883-99579

## S1. Calculate methods of electron-transport properties.

Here the most of electron-transport properties of the structure are handled by the non-equilibrium Green function formalism:

$$G(E) = (ES - H - \Sigma_1 - \Sigma_2)^{-1} \quad (1)$$

A recursive method<sup>1</sup> is utilized to process the self-energy matrices  $\Sigma_{1,2}$  which are used to describe the effect of the regions of source and drain electrodes. After the model is chemically bonded to electrode contacts, its energy levels are broadened due to the hybridization with the delocalized wave functions in contacts. Thus, the self-energy matrices  $\Sigma_{1,2}$  of contacts are used to account for their effect on the “Y”-shaped model with broadening functions defined as  $\Gamma_{1,2} = i(\Sigma_{1,2} - \Sigma_{1,2}^+)$ .<sup>2</sup>

The formula for the density matrix  $\rho$  is used as follows:

$$\rho = \frac{1}{2\pi} \int_{-\infty}^{\infty} dE (f_1 G \Gamma_1 G^+ + f_2 G \Gamma_2 G^+) \quad (2)$$

$G$  and  $G^+$  represent the Green's function matrices reflected from the left and right electrodes to the central scattering region.

The transmission  $T$  represents the electron transmission probability:

$$T(E, V) = \text{trace}(\Gamma_1 G \Gamma_2 G^+) \quad (4)$$

The effect of gate voltage is taken into account by shifting the scattering region of the Hamiltonian with  $V_g$ . Details of such a theoretical method can be found in Refs.<sup>3</sup>

**Table S1. Structure file of tri-SiC (atom, corresponding x, y and z Cartesian coordinates in Å.**

|    |              |              |             |
|----|--------------|--------------|-------------|
| H  | 19.751962662 | 10.046944618 | 0.829033434 |
| H  | 19.751962662 | 10.046944618 | 7.019402504 |
| H  | 29.616277695 | 26.758432388 | 0.767166555 |
| H  | 29.616277695 | 26.758432388 | 6.957532883 |
| H  | 10.133015633 | 26.739244461 | 0.695370734 |
| H  | 10.133015633 | 26.739244461 | 6.885736942 |
| H  | 19.751962662 | 10.046944618 | 3.924221992 |
| H  | 29.616277695 | 26.758432388 | 3.862352610 |
| H  | 10.133015633 | 26.739244461 | 3.790556669 |
| Si | 19.652181625 | 11.540089607 | 0.824370205 |

---

|    |              |              |             |
|----|--------------|--------------|-------------|
| Si | 19.652181625 | 11.540089607 | 7.014740467 |
| Si | 19.336135864 | 16.825511932 | 0.820551991 |
| Si | 19.336135864 | 16.825511932 | 7.010915279 |
| Si | 23.741312027 | 23.409229279 | 0.765552759 |
| Si | 23.741312027 | 23.409229279 | 6.955916882 |
| Si | 28.331363678 | 26.004650116 | 0.766133130 |
| Si | 28.331363678 | 26.004650116 | 6.956501961 |
| Si | 15.799848557 | 23.023534775 | 0.706190228 |
| Si | 15.799848557 | 23.023534775 | 6.896554470 |
| Si | 11.393211365 | 25.940557480 | 0.700916946 |
| Si | 11.393211365 | 25.940557480 | 6.891280651 |
| Si | 19.482984543 | 14.183681488 | 2.371148825 |
| Si | 19.482984543 | 14.183681488 | 8.561518669 |
| Si | 19.144708633 | 19.473356247 | 2.437865496 |
| Si | 19.144708633 | 19.473356247 | 8.628235817 |
| Si | 21.425617218 | 22.134887695 | 2.313559771 |
| Si | 21.425617218 | 22.134887695 | 8.503929138 |
| Si | 26.044097900 | 24.694648743 | 2.312519789 |
| Si | 26.044097900 | 24.694648743 | 8.502889633 |
| Si | 17.977500916 | 21.504230499 | 2.182856321 |
| Si | 17.977500916 | 21.504230499 | 8.373226166 |
| Si | 13.608059883 | 24.501747131 | 2.250808239 |
| Si | 13.608059883 | 24.501747131 | 8.441178322 |
| Si | 19.652181625 | 11.540126801 | 3.919551373 |
| Si | 19.336135864 | 16.825511932 | 3.915735006 |
| Si | 23.741312027 | 23.409229279 | 3.860736609 |
| Si | 28.331363678 | 26.004650116 | 3.861312628 |
| Si | 15.799848557 | 23.023534775 | 3.801374197 |
| Si | 11.393211365 | 25.940557480 | 3.796100140 |
| Si | 19.482984543 | 14.183681488 | 5.466338634 |
| Si | 19.144708633 | 19.473356247 | 5.533055305 |
| Si | 21.425617218 | 22.134887695 | 5.408740520 |
| Si | 26.044097900 | 24.694648743 | 5.407709122 |
| Si | 17.977500916 | 21.504230499 | 5.278036594 |
| Si | 13.608059883 | 24.501747131 | 5.345988274 |
| C  | 19.435127258 | 15.019349098 | 0.823478818 |
| C  | 19.435127258 | 15.019349098 | 7.013849735 |
| C  | 19.798753738 | 20.325719833 | 0.883015931 |
| C  | 19.798753738 | 20.325719833 | 7.073379517 |
| C  | 20.585672379 | 21.654466629 | 0.765684605 |
| C  | 20.585672379 | 21.654466629 | 6.956047058 |
| C  | 25.296428680 | 24.270614624 | 0.764926910 |
| C  | 25.296428680 | 24.270614624 | 6.955295086 |
| C  | 19.045124054 | 21.642028809 | 0.642534971 |

---

|   |              |              |             |
|---|--------------|--------------|-------------|
| C | 19.045124054 | 21.642028809 | 6.832901955 |
| C | 14.304948807 | 24.041429520 | 0.703306139 |
| C | 14.304948807 | 24.041429520 | 6.893675804 |
| C | 19.593980789 | 12.371941566 | 2.371798754 |
| C | 19.593980789 | 12.371941566 | 8.562169075 |
| C | 19.295150757 | 17.662977219 | 2.368261099 |
| C | 19.295150757 | 17.662977219 | 8.558630943 |
| C | 22.967308044 | 22.980463028 | 2.313104868 |
| C | 22.967308044 | 22.980463028 | 8.503465652 |
| C | 27.604623795 | 25.582304001 | 2.313615561 |
| C | 16.490932465 | 22.549312592 | 2.253640175 |
| C | 16.490932465 | 22.549312592 | 8.444009781 |
| C | 12.090415001 | 25.493301392 | 2.248765230 |
| C | 12.090415001 | 25.493301392 | 8.439135551 |
| C | 19.435127258 | 15.019349098 | 3.918660164 |
| C | 19.798753738 | 20.325719833 | 3.978199005 |
| C | 20.585672379 | 21.654466629 | 3.860866785 |
| C | 25.296428680 | 24.270614624 | 3.860114574 |
| C | 19.045124054 | 21.642028809 | 3.737721682 |
| C | 14.304948807 | 24.041429520 | 3.798486233 |
| C | 19.593980789 | 12.371941566 | 5.466988564 |
| C | 19.295150757 | 17.662977219 | 5.463450432 |
| C | 22.967308044 | 22.980463028 | 5.408284664 |
| C | 27.604623795 | 25.582304001 | 5.408804893 |
| C | 16.490932465 | 22.549312592 | 5.348820210 |
| C | 12.090376854 | 25.493301392 | 5.343955040 |

**Table S2. Structure file of tri-SiC-BP (atom, corresponding x, y and z Cartesian coordinates in Å.**

|   |              |              |             |
|---|--------------|--------------|-------------|
| H | 19.789909363 | 9.904817581  | 0.759623945 |
| H | 19.789278030 | 9.904084206  | 6.950113297 |
| H | 29.501964569 | 26.794349670 | 0.775626659 |
| H | 29.501964569 | 26.794349670 | 6.965982437 |
| H | 9.923345566  | 26.799301147 | 0.765043914 |
| H | 9.923345566  | 26.799301147 | 6.955406189 |
| H | 19.789356232 | 9.904156685  | 3.854645252 |
| H | 29.501964569 | 26.794349670 | 3.870811701 |
| H | 9.923345566  | 26.799264908 | 3.860226154 |
| P | 19.316513062 | 11.251726151 | 0.757763982 |
| P | 19.319355011 | 11.252093315 | 6.948107719 |
| P | 19.770877838 | 16.774515152 | 0.757234752 |
| P | 19.771076202 | 16.774553299 | 6.947587967 |
| P | 19.882463455 | 13.974341393 | 2.302380085 |
| P | 19.882581711 | 13.974341393 | 8.492777824 |

---

|    |              |              |             |
|----|--------------|--------------|-------------|
| P  | 19.039754868 | 19.484327316 | 2.293623686 |
| P  | 19.039951324 | 19.484291077 | 8.483993530 |
| P  | 19.319000244 | 11.252056122 | 3.852983236 |
| P  | 19.770837784 | 16.774515152 | 3.852407694 |
| P  | 19.882543564 | 13.974452019 | 5.397578716 |
| P  | 19.039674759 | 19.484291077 | 5.388822556 |
| B  | 19.829158783 | 14.924915314 | 0.754683971 |
| B  | 19.829553604 | 14.924878120 | 6.945071697 |
| B  | 19.484010696 | 20.470523834 | 0.747256517 |
| B  | 19.484010696 | 20.470523834 | 6.937633514 |
| B  | 19.725271225 | 12.129071236 | 2.304822206 |
| B  | 19.725467682 | 12.129071236 | 8.495702744 |
| B  | 19.598955154 | 17.713935852 | 2.304887056 |
| B  | 19.599151611 | 17.713935852 | 8.495228767 |
| B  | 19.829433441 | 14.924878120 | 3.849826336 |
| B  | 19.483972549 | 20.470487595 | 3.842462778 |
| B  | 19.726652145 | 12.129034042 | 5.400206566 |
| B  | 19.598995209 | 17.713899612 | 5.400067806 |
| C  | 20.536354065 | 21.779386520 | 0.768182456 |
| C  | 20.536394119 | 21.779424667 | 6.958461285 |
| C  | 25.367544174 | 24.004190445 | 0.771036804 |
| C  | 25.367544174 | 24.004190445 | 6.961413860 |
| C  | 19.023012161 | 22.083343506 | 0.771970868 |
| C  | 19.023012161 | 22.083343506 | 6.962286949 |
| C  | 14.099266052 | 24.073125839 | 0.768781364 |
| C  | 14.099266052 | 24.073125839 | 6.959148407 |
| C  | 23.086280823 | 22.644369125 | 2.317190409 |
| C  | 23.086200714 | 22.644479752 | 8.507551193 |
| C  | 27.581563950 | 25.471984863 | 2.321053267 |
| C  | 27.581563950 | 25.471984863 | 8.511423111 |
| C  | 16.498277664 | 22.956726074 | 2.317274094 |
| C  | 16.498395920 | 22.956981659 | 8.507643700 |
| C  | 11.841653824 | 25.469636917 | 2.314869165 |
| C  | 11.841653824 | 25.469636917 | 8.505239487 |
| C  | 20.536394119 | 21.779424667 | 3.863346100 |
| C  | 25.367584229 | 24.004154205 | 3.866224527 |
| C  | 19.023012161 | 22.083307266 | 3.867143869 |
| C  | 14.099225998 | 24.073091507 | 3.863968134 |
| C  | 23.086280823 | 22.644332886 | 5.412370682 |
| C  | 27.581563950 | 25.471984863 | 5.416243076 |
| C  | 16.498237610 | 22.956615448 | 5.412454128 |
| C  | 11.841653824 | 25.469636917 | 5.410058498 |
| Si | 23.860006332 | 23.068918228 | 0.769737720 |
| Si | 23.860006332 | 23.068918228 | 6.960123539 |

---

|    |              |              |             |
|----|--------------|--------------|-------------|
| Si | 28.277582169 | 25.945215225 | 0.773645103 |
| Si | 28.277582169 | 25.945215225 | 6.964014053 |
| Si | 15.694698334 | 23.303972244 | 0.769579887 |
| Si | 15.694658279 | 23.303936005 | 6.959956169 |
| Si | 11.142001152 | 25.939748764 | 0.767142415 |
| Si | 11.142001152 | 25.939748764 | 6.957514286 |
| Si | 21.427907944 | 22.065732956 | 2.316549778 |
| Si | 21.427747726 | 22.066062927 | 8.506900787 |
| Si | 26.087808609 | 24.479661942 | 2.318843365 |
| Si | 26.087808609 | 24.479698181 | 8.509222031 |
| Si | 18.160875320 | 22.400873184 | 2.320217609 |
| Si | 18.161111832 | 22.401496887 | 8.510578156 |
| Si | 13.352585793 | 24.504608154 | 2.316224813 |
| Si | 13.352585793 | 24.504644394 | 8.506594658 |
| Si | 23.860046387 | 23.068880081 | 3.864924431 |
| Si | 28.277542114 | 25.945215225 | 3.868833780 |
| Si | 15.694619179 | 23.303789139 | 3.864766836 |
| Si | 11.142001152 | 25.939714432 | 3.862324476 |
| Si | 21.427946091 | 22.065660477 | 5.411711216 |
| Si | 26.087808609 | 24.479661942 | 5.414032936 |
| Si | 18.160755157 | 22.400653839 | 5.415388584 |
| Si | 13.352585793 | 24.504571915 | 5.411414146 |

**Table S3. Structure file of tri-SiC-PbS (atom, corresponding x, y and z Cartesian coordinates in Å.**

|   |              |              |             |
|---|--------------|--------------|-------------|
| C | 17.567649841 | 16.048925400 | 0.558335721 |
| C | 22.107393265 | 18.391424179 | 0.534626126 |
| C | 15.952651024 | 15.990599632 | 0.634266019 |
| C | 11.373600006 | 18.391925812 | 0.637173891 |
| C | 19.819610596 | 17.074075699 | 2.036492825 |
| C | 24.439910889 | 19.740499496 | 2.031075001 |
| C | 13.661049843 | 17.074924469 | 2.136033058 |
| C | 9.041753769  | 19.740400314 | 2.133827925 |
| C | 17.560485840 | 15.946300507 | 3.565088987 |
| C | 22.118074417 | 18.398849487 | 3.557528973 |
| C | 15.922317505 | 15.976025581 | 3.650094032 |
| C | 11.364793777 | 18.398450851 | 3.660228014 |
| C | 19.818908691 | 17.070800781 | 5.091525078 |
| C | 24.442523956 | 19.741926193 | 5.091543198 |
| C | 13.665403366 | 17.073749542 | 5.193927288 |
| C | 9.040916443  | 19.741001129 | 5.194413185 |
| C | 17.581478119 | 15.975549698 | 6.626439095 |
| C | 22.116098404 | 18.396749496 | 6.613263130 |
| C | 15.906614304 | 15.972250938 | 6.727283955 |

---

|    |              |              |             |
|----|--------------|--------------|-------------|
| C  | 11.367340088 | 18.395750046 | 6.716196060 |
| C  | 19.819343567 | 17.083999634 | 8.111564636 |
| C  | 24.426887512 | 19.732849121 | 8.115884781 |
| C  | 13.660916328 | 17.084449768 | 8.215884209 |
| C  | 9.055046082  | 19.732975006 | 8.218665123 |
| Si | 20.579214096 | 17.513200760 | 0.534201264 |
| Si | 25.207752228 | 20.183725357 | 0.530072987 |
| Si | 12.901078224 | 17.514024734 | 0.637249470 |
| Si | 8.274448395  | 20.183450699 | 0.633064508 |
| Si | 18.346138000 | 16.220325470 | 2.053232908 |
| Si | 22.878850937 | 18.838926315 | 2.032560110 |
| Si | 15.136965752 | 16.223125458 | 2.127419949 |
| Si | 10.602980614 | 18.839025497 | 2.135006905 |
| Si | 20.569236755 | 17.506050110 | 3.558735132 |
| Si | 25.185787201 | 20.171224594 | 3.557295084 |
| Si | 12.911826134 | 17.506525040 | 3.659166098 |
| Si | 8.295910835  | 20.171298981 | 3.660524845 |
| Si | 18.320960999 | 16.221549988 | 5.093604088 |
| Si | 22.872457504 | 18.835124969 | 5.091606140 |
| Si | 15.158662796 | 16.224674225 | 5.182146072 |
| Si | 10.608203888 | 18.835948944 | 5.193828106 |
| Si | 20.574893951 | 17.509874344 | 6.611850262 |
| Si | 25.189067841 | 20.172950745 | 6.615944862 |
| Si | 12.906368256 | 17.510774612 | 6.714900017 |
| Si | 8.292394638  | 20.173250198 | 6.718247890 |
| Si | 18.375000000 | 16.218700409 | 8.111483574 |
| Si | 22.882232666 | 18.841323853 | 8.115452766 |
| Si | 15.106296539 | 16.222000122 | 8.216739655 |
| Si | 10.599398613 | 18.841199875 | 8.218862534 |
| H  | 26.494058609 | 20.926275253 | 0.458488792 |
| H  | 6.987940311  | 20.926399231 | 0.561334491 |
| H  | 26.481872559 | 20.919124603 | 3.550139904 |
| H  | 7.000027180  | 20.919223785 | 3.652992010 |
| H  | 26.482675552 | 20.919775009 | 6.647030830 |
| H  | 6.998888493  | 20.919925690 | 6.749855995 |
| S  | 16.915088654 | 14.709700584 | 0.314511299 |
| S  | 16.707567215 | 14.656350136 | 3.520871878 |
| S  | 16.764051437 | 14.699975014 | 6.737885952 |
| S  | 16.675125122 | 5.696450233  | 1.858851075 |
| S  | 16.673717499 | 5.794724941  | 5.107662201 |
| S  | 16.733884811 | 5.940424919  | 8.888372421 |
| S  | 16.963571548 | 8.747924805  | 0.429791391 |
| S  | 16.695013046 | 8.806349754  | 3.507282019 |
| S  | 16.813772202 | 8.855750084  | 6.650073051 |

---

|    |              |              |             |
|----|--------------|--------------|-------------|
| S  | 16.829845428 | 11.750075340 | 1.980207086 |
| S  | 16.756284714 | 11.724124908 | 5.078880310 |
| S  | 17.045568466 | 11.630199432 | 8.131877899 |
| Pb | 16.652690887 | 4.058350086  | 8.938133240 |
| Pb | 16.660827637 | 4.400449753  | 3.506588936 |
| Pb | 16.666854858 | 4.489274979  | 6.716403008 |
| Pb | 16.595603943 | 7.644750118  | 1.989665985 |
| Pb | 16.644588470 | 7.729899883  | 5.106275558 |
| Pb | 16.387514114 | 7.717424393  | 8.100459099 |
| Pb | 16.312549591 | 10.693974495 | 0.492780596 |
| Pb | 16.622323990 | 10.671975136 | 3.517091990 |
| Pb | 16.439311981 | 10.679049492 | 6.632982254 |
| Pb | 16.572635651 | 13.604049683 | 1.907360911 |
| Pb | 16.607757568 | 13.592250824 | 5.140593052 |
| Pb | 16.247795105 | 13.493500710 | 8.234504700 |

**Table S4. Structure file of tri-SiC-PbSe (atom, corresponding x, y and z Cartesian coordinates in Å.**

|    |              |              |             |
|----|--------------|--------------|-------------|
| C  | 17.568187714 | 16.043775558 | 0.536181271 |
| C  | 22.106256485 | 18.390699387 | 0.519805789 |
| C  | 15.946156502 | 15.988649368 | 0.616911292 |
| C  | 11.374938965 | 18.390951157 | 0.622544408 |
| C  | 19.810638428 | 17.070749283 | 2.027699947 |
| C  | 24.438339233 | 19.739500046 | 2.023668051 |
| C  | 13.670157433 | 17.072700500 | 2.128733873 |
| C  | 9.043327332  | 19.739500046 | 2.126502037 |
| C  | 17.550708771 | 15.955850601 | 3.559113026 |
| C  | 22.115564346 | 18.397174835 | 3.555044889 |
| C  | 15.937451363 | 15.981123924 | 3.647699833 |
| C  | 11.366970062 | 18.396949768 | 3.657906055 |
| C  | 19.810001373 | 17.068199158 | 5.093360901 |
| C  | 24.439342499 | 19.740074158 | 5.093639851 |
| C  | 13.673873901 | 17.070600510 | 5.195888996 |
| C  | 9.043260574  | 19.739624023 | 5.196609020 |
| C  | 17.577093124 | 15.985274315 | 6.634674072 |
| C  | 22.114057541 | 18.395624161 | 6.622019768 |
| C  | 15.910497665 | 15.990850449 | 6.741261005 |
| C  | 11.368711472 | 18.394824982 | 6.724791050 |
| C  | 19.811038971 | 17.078624725 | 8.125839233 |
| C  | 24.427223206 | 19.732975006 | 8.130113602 |
| C  | 13.669487000 | 17.080024719 | 8.229834557 |
| C  | 9.054912567  | 19.732975006 | 8.232677460 |
| Si | 20.573856354 | 17.510574341 | 0.518850923 |
| Si | 25.206546783 | 20.182849884 | 0.517088711 |



---

|    |              |              |             |
|----|--------------|--------------|-------------|
| Si | 12.906736374 | 17.511400223 | 0.621984601 |
| Si | 8.275420189  | 20.182723999 | 0.619971275 |
| Si | 18.337234497 | 16.208250046 | 2.040651083 |
| Si | 22.878047943 | 18.838499069 | 2.025216103 |
| Si | 15.143394470 | 16.211200714 | 2.122452021 |
| Si | 10.603784561 | 18.838575363 | 2.127537012 |
| Si | 20.565822601 | 17.504974365 | 3.556332111 |
| Si | 25.189002991 | 20.172874451 | 3.555791855 |
| Si | 12.915374756 | 17.505350113 | 3.657060146 |
| Si | 8.292796135  | 20.172899246 | 3.658617020 |
| Si | 18.315670013 | 16.205150604 | 5.094305992 |
| Si | 22.874130249 | 18.836149216 | 5.093595028 |
| Si | 15.164186478 | 16.208299637 | 5.185521126 |
| Si | 10.607132912 | 18.836624146 | 5.196023941 |
| Si | 20.570308685 | 17.508251190 | 6.621219158 |
| Si | 25.191413879 | 20.174200058 | 6.622577667 |
| Si | 12.911256790 | 17.509151459 | 6.724602222 |
| Si | 8.290754318  | 20.174049377 | 6.725384712 |
| Si | 18.367969513 | 16.207473755 | 8.120052338 |
| Si | 22.882099152 | 18.841199875 | 8.129394531 |
| Si | 15.112055779 | 16.209850311 | 8.223525047 |
| Si | 10.599398613 | 18.841175079 | 8.232893944 |
| H  | 26.491884232 | 20.925125122 | 0.457248598 |
| H  | 6.990216732  | 20.925125122 | 0.560077190 |
| H  | 26.482877731 | 20.919851303 | 3.550103903 |
| H  | 6.999089718  | 20.919851303 | 3.652983189 |
| H  | 26.483377457 | 20.920175552 | 6.646950245 |
| H  | 6.998553753  | 20.920175552 | 6.749783993 |
| Se | 16.877021790 | 14.683898926 | 0.358595997 |
| Se | 16.691864014 | 14.630701065 | 3.516281843 |
| Se | 16.734085083 | 14.677600861 | 6.716591835 |
| Se | 16.672378540 | 5.678925037  | 1.854009032 |
| Se | 16.672647476 | 5.789025307  | 5.116724968 |
| Se | 16.713930130 | 5.957674980  | 8.778536797 |
| Se | 16.877990723 | 8.737874985  | 0.503257513 |
| Se | 16.688516617 | 8.802575111  | 3.506372929 |
| Se | 16.793415070 | 8.853300095  | 6.612489223 |
| Se | 16.821172714 | 11.750124931 | 2.016224861 |
| Se | 16.740381241 | 11.727525711 | 5.081274033 |
| Se | 17.011617661 | 11.557800293 | 8.088542938 |
| Pb | 16.652791977 | 4.134250164  | 8.960393906 |
| Pb | 16.664409637 | 4.445125103  | 3.513312101 |
| Pb | 16.667022705 | 4.544175148  | 6.763122082 |
| Pb | 16.614555359 | 7.611800194  | 2.011887074 |

---

|    |              |              |             |
|----|--------------|--------------|-------------|
| Pb | 16.644756317 | 7.713124752  | 5.092938423 |
| Pb | 16.467836380 | 7.799074650  | 8.092412949 |
| Pb | 16.347871780 | 10.761349678 | 0.516969025 |
| Pb | 16.618673325 | 10.663274765 | 3.526956081 |
| Pb | 16.456050873 | 10.658075333 | 6.599582672 |
| Pb | 16.579500198 | 13.587975502 | 1.905578971 |
| Pb | 16.627178192 | 13.587249756 | 5.134734154 |
| Pb | 16.351989746 | 13.513049126 | 8.248455048 |

### S2. The computational methods used to calculate the data in Figures 3, 8, 9. (I-V characteristic)

The calculation formula of current  $I$  is as follows:

$$I = \frac{2e}{h} \int_{-\infty}^{\infty} dE (T(E, V) (f_1(E) - f_2(E))) \quad (3)$$

The  $T(E, V)$  is the transmission function representing the probability of electron transmission from source to drain contact through the device,  $f_{1,2}(E)$  denotes the Fermi functions of source and drain, while  $e$  and  $h$  are the electron charge and Planck constant, respectively.

### S3. The computational methods used to calculate the data in Figures 5. (DOS, transmission spectra, LDOS)

In NEGF theory, the transmission function  $T(E, V)$  of the system is a sum of transmission probabilities of all channels available at energy  $E$  under external bias voltage  $V$ <sup>4</sup>:

$$T(E, V) = \text{Tr}[\Gamma_L(V) G_R(E, V) \Gamma_R(V) G_A(E, V)],$$

where  $G^{R,A}$  is the retarded and advanced Green's function, coupling function  $\Gamma_{L,R}$  are the imaginary parts of the left and right self-energies, respectively. Self-energy depends on the surface Green's functions of the electrode regions and comes from the nearest-neighbor interaction between the extended molecule region and the electrodes. There are several methods discussed in literature for the calculation of surface Green's function.<sup>5</sup>

The device density of states (DDOS)  $D(E)$  is computed via the spectral density matrix  $\rho(E) = \rho^L(E) + \rho^R(E)$  where  $L/R$  denotes the contribution from the left/right electrode.

The local density of states (LDOS) is now defined as

$$D(E, \mathbf{r}) = \sum_{ij} \rho_{ij}(E) \phi_i(\mathbf{r}) \phi_j(\mathbf{r}),$$

where we note that the basis set orbitals  $\phi_i(\mathbf{r})$  are real functions in ATK through the use of solid harmonics.

The device density of states is then obtained by integrating the LDOS over all space:

$$D(E) = \int d\mathbf{r} D(E, \mathbf{r}) = \sum_{ij} \rho_{ij}(E) S_{ij},$$

where  $S_{ij} = \int \phi_i(\mathbf{r}) \phi_j(\mathbf{r}) d\mathbf{r}$  is the overlap matrix.

Introducing  $M_i(E) = \sum_j \rho_{ij}(E) S_{ij}$  we may write this as

$$D(E) = \sum_i M_i(E),$$

where thus  $M_i(E)$  can be seen as the contribution to the DDOS from orbital  $i$ .  $M_i(E)$  is a spectral mulliken population, with

$$M_i = \int M_i(E) f\left(\frac{E - \mu}{k_B T}\right) dE.$$

$M_i(E)$  can be summed over orbitals of a particular angular momentum, and/or over one or several atoms, to give the projected device density of states (PDDOS), which also can be plotted in VNL.

## Reference

1. S. Datta, *Phys. Today*, 1995, **49**, 70-70.
2. A. Colli, A. Tahraoui, A. Fasoli, J. M. Kivioja, W. I. Milne and A. C. Ferrari, *ACS nano*, 2009, **3**, 1587-1593.
3. J. Taylor, H. Guo and J. Wang, *Phys.rev.b*, 2001, **63**, 263-271.
4. S. Datta, *Phys. Today*, 1996, **49**, 70-70.
5. F. Guinea, C. Tejedor, F. Flores and E. Louis, *Physical Review B*, 1983, **28**, 4397-4402.
